# Supplementary material for: The Bioactive Extract of Pinnigorgia sp. Induces Apoptosis of Hepatic Stellate Cells via ROS-ERK/JNK-Caspase-3 Signaling
Source: MDPI journal article supplement (doi:10.3390/md16010019), 2018-01-09
Supplement: s1 [file s1]

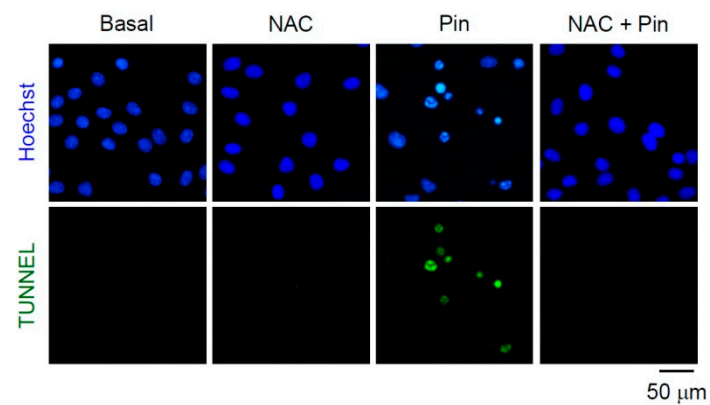

**Figure S1.** *N*-acetylcysteine (NAC) abolishes the Pin-induced apoptosis in hepatic stellate cells (HSCs). HSC-T6 cells were pretreated with NAC (2.5 mM) for 1 h and then incubated with Pin (6  $\mu$ g/mL) for 12 h. Apoptotic effect of pinnigorgiol A were determined by terminal deoxynucleotidyl transferase dUTP nick end labeling (TUNEL) assay (green). Hoechst 33,342 (blue) was used to visualize the cell nucleus.

(A)

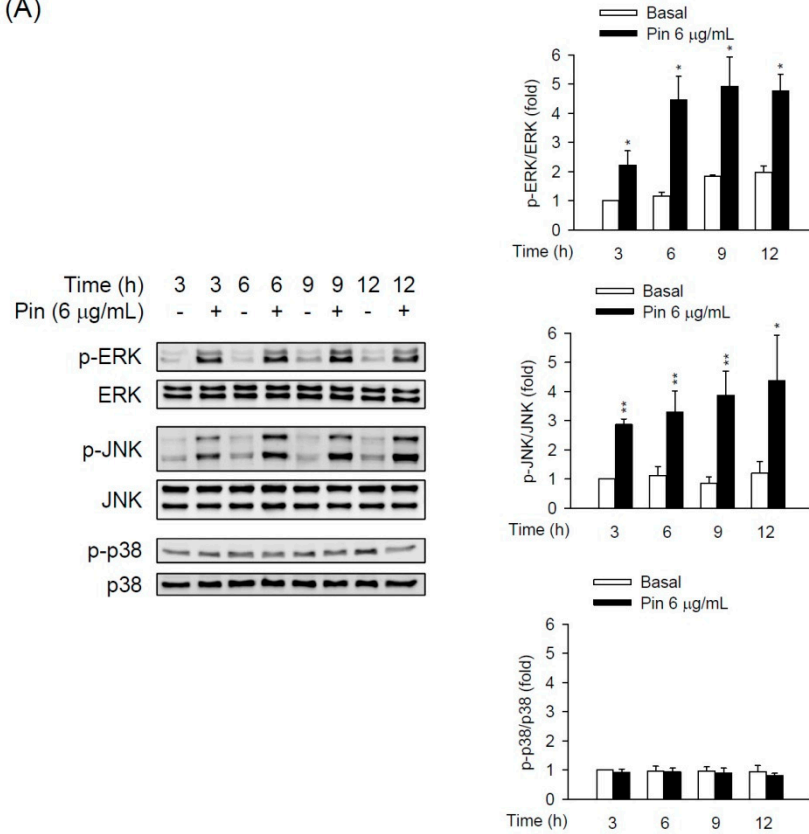

(B)

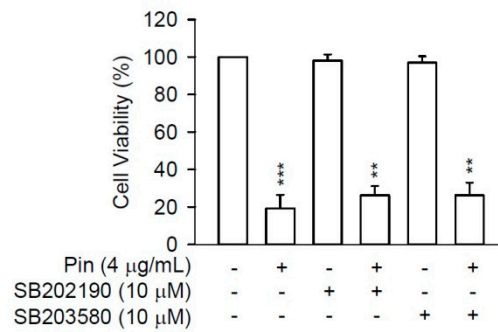

**Figure S2.** Pin-induced apoptosis is independent of p38 MAPK in HSCs. **(A)** HSC-T6 cells were treated with Pin (6  $\mu\text{g/mL}$ ) for 3–12 h. Phosphorylation of ERK, JNK and p38 were analyzed by immunoblot analysis using antibodies against p-p38, p-JNK, or p-ERK. Quantitation of the p-p38/p38, p-JNK/JNK, and p-ERK/ERK ratio was shown; **(B)** HSC-T6 cells were pretreated with SB202190 or SB203580 (p38 inhibitor; 10  $\mu\text{M}$ ) for 1 h and then exposed to Pin (4  $\mu\text{g/mL}$ ) for 24 h. Cytotoxicity assay was monitored spectrophotometrically at 450 nm. All data are expressed as the mean  $\pm$  S.E.M. ( $n = 3$ ). \*  $p < 0.05$ , \*\*  $p < 0.01$ , \*\*\*  $p < 0.001$  compared with the basal.

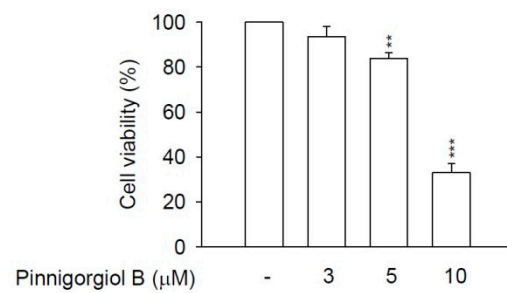

**Figure S3.** Pinnigorgiol B inhibits the cell viability of HSCs. HSC-T6 cells were treated with pinnigorgiol B (3–10  $\mu$ M) for 24 h. Cytotoxicity assay was monitored spectrophotometrically at 450 nm.
